# Supplementary material
Source: Springer Nature journal article supplement (https://www.springermedizin.de/resource/supplementary/12905_2011_302_MOESM2_ESM.pdf/9518366)
Supplement: MOESM2 [file 9518366]

## Box 2: Themes and categories

### Themes

### Categories

**Ambivalence in prioritizing  
own health**

- *Children and family come first*
- *Family and social support towards seeking breast health care*

**Feeling fear of breast cancer**

- *An incurable disease associated with suffering and death*
- *Fear of the risk of diminished femininity and husband's rejection*
- *Fear of social stigmatization*
- *Apprehensions about breast health examinations*

**Feeling safe from breast  
cancer**

- *Perceiving themselves as not being in the risk zone for breast cancer*
- *Accepting breast cancer as a test from God*
- *Comfort in acquiring breast health knowledge and skills*
